# Supplementary material for: An estimation of the absolute number of axons indicates that human cortical areas are sparsely connected
Source: PubMed Central journal article supplement (PMC8947121; doi:10.1371/journal.pbio.3001575), 2022-03-14
Supplement: pbio.3001575.s003.pdf [file pbio.3001575.s003.pdf]

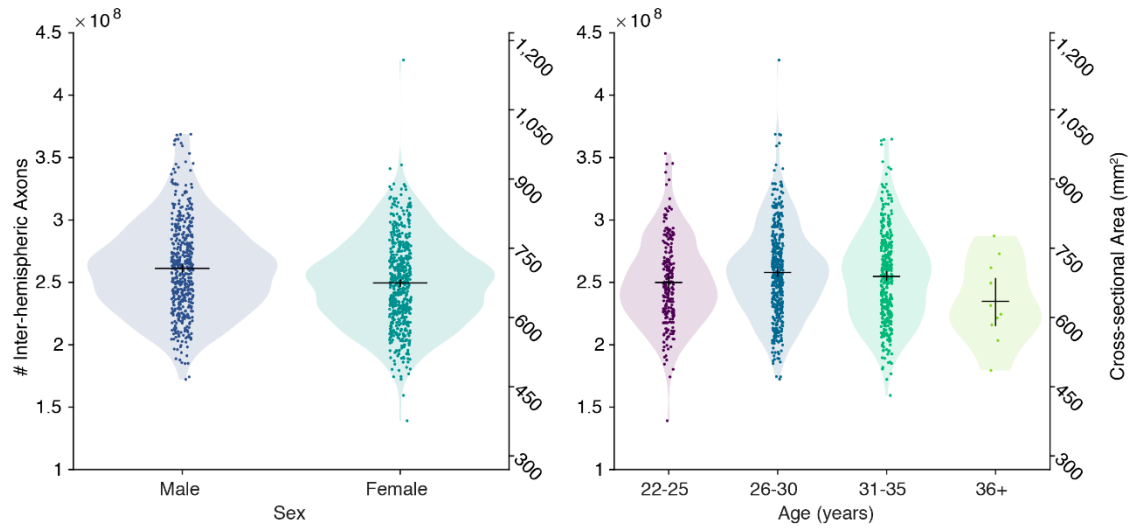

**S2 Fig: Effects of sex and age on the inter-hemispheric connectivity.** Each individual's total number of estimated inter-hemispheric axons is shown with a marker. The black horizontal bars show the group means and vertical bars the bootstrapped 95% confidence intervals these means. Shading shows a kernel density estimate of the group distributions. Note that while the number of pairwise axons is approximately log-normally distributed across areal pairs, it is approximately normally distributed across individuals. The only significant group difference is between the 22-15 and 25-30 age groups,  $F_{1,1064} = 7.646$ ,  $p = 0.0058$ . Interactions between sex and age effect were not significant. As we assume a constant fiber density, our estimate the total number of inter-hemispheric fibers is a linear multiple of the callosal cross-sectional area.
